# Supplementary material for: Environmental Calcium Initiates a Feed-Forward Signaling Circuit That Regulates Biofilm Formation and Rugosity in Vibrio vulnificus
Source: PubMed Central journal article supplement (PMC6113621; doi:10.1128/mbio.01377-18), 2018-08-28
Supplement: mbo004184044sf1.pdf [file mbo004184044sf1.pdf]

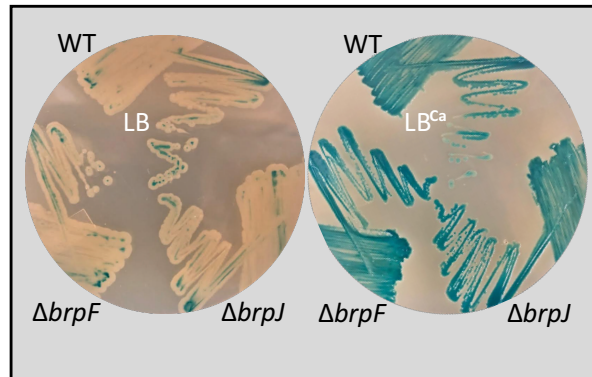

**Figure S1. Calcium-induced *brp* expression is not dependent on BRP production.** The indicated wildtype (WT), *brpF* and *brpJ* mutant strains were grown on LB and LB<sup>Ca</sup> plates containing X-gal.
