# Supplementary material for: Environmental Calcium Initiates a Feed-Forward Signaling Circuit That Regulates Biofilm Formation and Rugosity in Vibrio vulnificus
Source: PubMed Central journal article supplement (PMC6113621; doi:10.1128/mbio.01377-18), 2018-08-28
Supplement: mbo004184044sf2.pdf [file mbo004184044sf2.pdf]

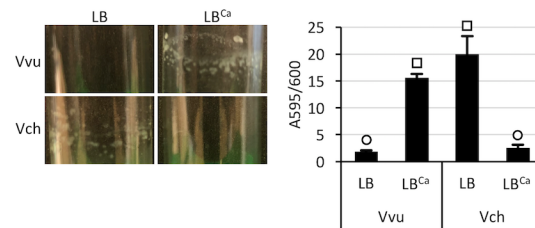

**Figure S2. Inverse effect of calcium on biofilm formation by *V. vulnificus* and *V. cholerae*.** Wildtype *V. vulnificus* (Vvu) and *V. cholerae* (Vch) were grown in LB or LB containing 10 mM CaCl<sub>2</sub> (LB<sup>Ca</sup>). Left, images of the biofilm ring in culture tubes. Right, quantification of biofilm formation by CV staining in 96-well plates. Statistically significant differences among the samples ( $p < 0.001$  as determined by one-way ANOVA followed by pairwise comparisons with a Bonferroni adjustment) are indicated by different symbols above each bar.
