# Supplementary material for: Environmental Calcium Initiates a Feed-Forward Signaling Circuit That Regulates Biofilm Formation and Rugosity in Vibrio vulnificus
Source: PubMed Central journal article supplement (PMC6113621; doi:10.1128/mbio.01377-18), 2018-08-28
Supplement: mbo004184044sf3.pdf [file mbo004184044sf3.pdf]

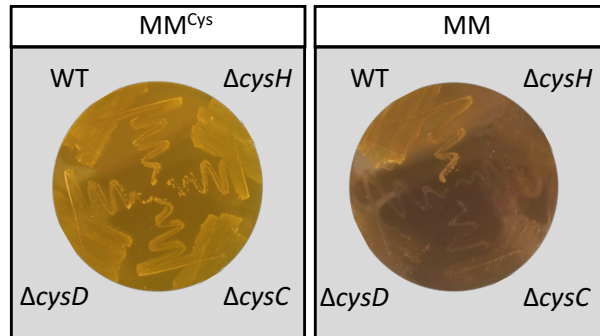

**Figure S3. Auxotrophic phenotype of the *cys* mutants.** The wildtype (WT), *cysD*, *cysC* and *cysH* mutants were inoculated onto minimal media (MM) with or without 0.5 mM cysteine (MM<sup>Cys</sup>).
