# Supplementary material for: Environmental Calcium Initiates a Feed-Forward Signaling Circuit That Regulates Biofilm Formation and Rugosity in Vibrio vulnificus
Source: PubMed Central journal article supplement (PMC6113621; doi:10.1128/mbio.01377-18), 2018-08-28
Supplement: mbo004184044sf5.pdf [file mbo004184044sf5.pdf]

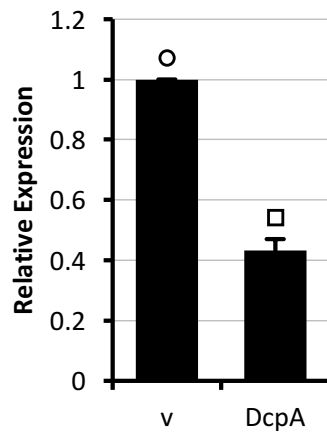

**Figure S5. The expression of *cysJ* is c-di-GMP dependent.** qRT-PCR was used to confirm that *cysJ* transcript levels decreased in wildtype cells when intracellular c-di-GMP levels were elevated (DcpA) relative to unaltered (v) conditions. Expression values are relative to those under unaltered conditions. Statistical significance was determined by the Student t-test (two-tailed distribution with two-sample, equal variance).
